# Supplementary material
Source: PubMed Central journal article supplement (PMC4860090)
Supplement: NIHMS771120-supplement-7.pdf [file NIHMS771120-supplement-7.pdf]

## Welllderly Definition

### Exclusion Criteria:

**ICD-9:** 149.\*172.\*, 174.\*-198.\*, 200.\*-239.\*, 289.0, 410.\*-414.\*, 429.2, 453.40, 415.1, 325, 344.5, 362.34, 368.12, 433.00, 433.10, 433.20, 433.80, 433.8, 433.9, 434.00, 434.10, 434.90, 434.91, 435.0, 435.1, 435.3, 435.8, 435.9 436, 437.1, 437.6, 437.7, 437.8, 437.9, 438.20, 438.50, 438.50, 438.81, 438.89, 438.9, 784.3, 784.69, V12.51, V12.54, 434.91, 250.\*, 585.\*, V45.11, V56, 39.95, 714.0, 710.0, 710.1, 710.2, 710.3, 710.4, 710.5, 555.\*, 556.\*, 340, 331.0, 332, 441.\*, 437.3

OR

**CPT:** 566, 4110F, 90935, 90937

OR

**Labs:** HgbA1C > 6.5 or Gluc >200

OR

**Medications:** clopidogrel, plavix, prasugrel, effient, ticagrelor, brilinta, cilostazol, pletal, dipyridamole, aggrenox, persantine, ticlopidine, ticlid, donepezil, aricept, rivastigmine, exelon, galantamine, nivalin, razadyne, reminyl, lycoremine, cognex, tacrine

### Notes:

- Any Cancer (including polycythemia (289.0) and Melanoma (172.\*, V10.82)); excluding basal or squamous cell skin cancer). (149.\*172.\*, 174.\*-198.\*, 200.\*-239.\*)
- Coronary Artery Disease (411.\*-414.\*, 429.\*)/Myocardial Infarction (410.\*) (CPT 566 – anesthesia for direct CABG w/o pump oxygenator, 4110F – internal mammary artery graft performed for primary, isolated CABG)
- Stroke (325, 344.5, 362.34, 368.12, 433.00, 433.10, 433.20, 433.80, 433.8, 433.9, 434.00, 434.10, 434.90, 434.91, 435.0, 435.1, 435.3, 435.8, 435.9 436, 437.1, 437.6, 437.7, 437.8, 437.9, 438.20, 438.50, 438.50, 438.81, 438.89, 438.9, 784.3, 784.69, V12.51, V12.54, 434.91) /TIA (435.9)
- Deep Vein Thrombosis (453.40)/Pulmonary Embolus (415.1)
- Chronic Renal Disease (585.\*)/Hemodialysis (V45.11, V56, 39.95, cpt: 90935, 90937)
- Significant Auto-immune/Inflammatory conditions such as (Rheumatoid Arthritis (714.0, Lupus & other diffuse diseases of connective tissue (710.0), Crohn's (555.\*), Ulcerative colitis (556.\*), MS (340) etc.)
- Alzheimer (331.0)/Parkinson (332)
- Diabetes (Hemoglobin A1C > 6.5 % or fasting glucose >126 mg/dL or treated with oral diabetic medication or insulin if known)
- Aortic or Cerebral Aneurysm (441.\*, 437.3)
- Anti-platelet agents, not including aspirin (ex.:clopidogrel/plavix, dipyridamole/aggrenox/ persantine, ticlopidine/ticlid)
- Cholinesterase inhibitor for Alzheimer disease (i.e. donepezil/Aricept)

### Allowed Basal/Squamous Skin Cancer Definition:

Histology:

80702 - Squamous cell carcinoma in situ, NOS  
80703 - Squamous cell carcinoma, NOS  
80712 - Sq. cell carcinoma, keratinizing, NOS, in situ  
80713 - Squamous cell carcinoma, keratinizing, NOS  
80722 - Sq. cell carcinoma, lg cell non-ker., situ  
80723 - Squamous cell carcinoma, lg cell, nonkeratinizing, NOS  
80733 - Squamous cell carcinoma, sm cell, nonkeratinizing  
80743 - Squamous cell carcinoma, spindle cell  
80753 - Squamous cell carcinoma, adenoid  
80762 - Squamous cell carcinoma in situ, question stromal inv  
80763 - Squamous cell carcinoma, microinvasive  
80772 - Squamous intraepithelial neoplasia, grade III  
80783 - Squamous cell carcinoma with horn formation  
80802 - Queyrat erythroplasia  
80812 - Bowen disease  
80823 - Lymphoepithelial carcinoma  
80833 - Basaloid squamous cell carcinoma  
80843 - Squamous cell carcinoma, clear cell type  
80901 - Basal cell tumor  
80903 - Basal cell carcinoma, NOS  
80913 - Basal cell carcinoma, multifocal superficial  
80923 - Basal cell carcinoma, infiltrating, NOS  
80933 - Basal cell carcinoma, fibroepithelial  
80943 - Basosquamous carcinoma  
80953 - Metatypical carcinoma  
80960 - Intraepidermal epithelioma of Jadassohn  
80973 - Basal cell carcinoma, nodular  
80983 - Adenoid basal carcinoma

AND

Primary Site:

C440 - Skin of lip  
C441 - Eyelid  
C442 - External ear  
C443 - Skin of other/unspecified parts of face, NOS  
C444 - Skin of scalp and neck  
C445 - Skin of trunk  
C446 - Skin of upper limb and shoulder  
C447 - Skin of lower limb and hip  
C448 - Skin, overlapping lesion  
C449 - Skin, NOS

## Gene Lists Considered for Pathogenic Variant Burden Analysis

Hereditary Dementia: ALS2, ANG, APP, ATP13A2, ATXN2, C9orf72, CHGB, CHMP2B, DCTN1, DNAJC6, EIF4G1, ERBB4, FBXO7, FIG4, FUS, GIGYF2, GRN, HNRNPA1, HTRA2, LRRK2, MAPT, MATR3, NEFH, OPTN, PARK2, PARK7, PFN1, PINK1, PLA2G6, PRNP, PRPH2, PSEN1, PSEN2, SETX, SIGMAR1, SNCA, SOD1, SORL1, SPG20, SYNJ1, TARDBP, TREM2, UBQLN2, VAPB, VCP, VEGFA, VPS35, VPS54

Hereditary Cancer: AIP, APC, ARID1A, ARID1B, ATM, AXIN2, BAP1, BARD1, BHD, BLM, BMPR1A, BRCA1, BRCA2, BRIP1, BTBD12, BUB1B, C17orf68, CDC73, CDH1, CDKN1A, CDKN1B, CDKN1C, CDKN2A, CDKN2B, CDKN2C, CHEK2, CREBBP, CYLD, DDB2, DICER1, DKC1, DNMT3A, EP300, EPCAM, ERCC1, ERCC2, ERCC3, ERCC4, ERCC5, ERCC6, ERCC8, EXO1, EXT1, EXT2, FANCA, FANCB, FANCC, FANCD2, FANCE, FANCF, FANCG, FANCI, FANCL, FANCM, FH, FLCN, GPC3, HNF1A, MAX, MEN1, MINPP1, MITF, MLH1, MLH3, MRE11A, MSH2, MSH3, MSH6, MUTYH, NBN, NF1, NF2, NHP2, NOP10, PALB2, PAX3, PHOX2B, PMS1, PMS2, POLD1, POLE, POLE1, POLH, PRF1, PRKAR1A, PTCH1, PTCH2, PTEN, PTPN11, RAD50, RAD51, RAD51C, RAD51L3, RB1, RECQL4, SBDS, SDHA, SDHB, SDHC, SDHD, SETBP1, SMAD4, SMARCA4, SMARCB1, SMARCE1, SOS1, SPRED1, STK11, SUFU, TERC, TERT, TET2, TGFBR1, TGFBR2, TINF2, TMEM127, TP53, TRAD, TSC1, TSC2, VHL, WRAP53, WRN, WT1, XPA, XPC

Common Monogenic Disorders: ACTA2, ACTC1, APC, APOB, BRCA1, BRCA2, CACNA1S, COL3A1, DSC2, DSG2, DSP, FBN1, GLA, KCNH2, KCNQ1, LDLR, LMNA, MEN1, MLH1, MSH2, MSH6, MUTYH, MYBPC3, MYH11, MYH7, MYL2, MYL3, MYLK, NF2, NTRK1, PCSK9, PKP2, PMS2, PRKAG2, PTEN, RB1, RET, RYR1, RYR2, SCN5A, SDHAF2, SDHB, SDHC, SDHD, SMAD3, STK11, TGFBR1, TGFBR2, TMEM43, TNNT3, TNNT2, TP53, TPM1, TSC1, TSC2, VHL, WT1

## Supplemental Table Legends

**Supplemental Table S1. Variant Filtration, Related to Experimental Methods – Variant Filtration:** The number of variants removed per applied filter, broken down into rare (<1%), uncommon (1-5%) and common (>5%) variants. The cumulative total number of remaining variants is provided in the last row.

**Supplemental Table S2. Variant Characteristics, Related to Experimental Methods – Variant Filtration:** The number of variants identified in each cohort, broken down by coding impact, and allele frequency class - rare (<1%), uncommon (1-5%) and common (>5%) variants.

**Supplemental Table S7. COL25A1 Variants, Related to Figure 4.** The *COL25A1* variants observed in this study is displayed with the cDNA and protein impact, counts per cohort, and allele frequency in the Exome Aggregation Consortium cohort.
